# Supplementary material for: Wireless battery free fully implantable multimodal recording and neuromodulation tools for songbirds
Source: PubMed Central journal article supplement (PMC8009877; doi:10.1038/s41467-021-22138-8), 2021-03-30
Supplement: 41467_2021_22138_MOESM6_ESM.pdf [file 41467_2021_22138_MOESM6_ESM.pdf]

**Title:** Supplementary Movie 1:

**Description:** Video demonstrating the capability to program three individual devices in the same magnetic field and trigger optogenetic stimulation with low latency.

**Title:** Supplementary Movie 2:

**Description:** Demonstration of multimodal operation and multi device addressing.
